To date, two popular psychosocial theories (Theory of Planned Behaviour (TPB) and Health Belief Model (HBM)) have found wide use in explaining influential variables in food-related behaviours. According to the TPB, behaviour is a conscious act proximally mediated by intention [15]. The HBM on the other hand posits that a health behaviour results from a set of core beliefs [16]. It has been proposed that a combination of these two complementary theories will help broaden our understanding of factors that influence dietary behaviour [17,18].

In this paper, as part of the early steps in identifying cowpeas with potential for biofortification, we assessed the iron and zinc content of available cowpea landraces in northern Ghana. Secondly, using a combined model as proposed by Sun et al. [17], we aimed at identifying factors that influence the intention of mothers/caregivers to give cowpeas to their schoolchildren.

## Materials and Methods

### Study Area

This study was conducted in the Tolon-Kumbungu district of the Northern Region of Ghana. The region is well-suited for cowpea production and Tolon-Kumbungu district is among the three top production-processing-consuming sites for cowpea in the region [19]. The research area is located within the Guinea Savannah agro-ecological zone and has two distinct seasons; rainy season (April – September) and a dry season (December – March) characterized by relatively high day temperatures (35–40°C). The people of this area are largely subsistence farmers [20]. Two communities, Kpaligun and Tibung, were purposively selected because they were participating in a larger nutrition study that sought to investigate the potential role of cowpeas in improving iron status through school feeding programme. At the time, these two communities were the only ones piloting the government-supported school feeding programme in the district.

### Study Design and Subjects

**Cowpea landrace study.** Key informant interviews with 3 farmers and 3 market women were conducted in March 2008 to identify locally available landraces of cowpeas in the selected communities and the largest market in the main city, Tamale. Landraces were identified based on the local knowledge and experience of local farmers and market women. For each landrace, a sample of 200 g was collected after cleaning and separating mixed landraces. Seeds with holes or weevil attack were removed by hand. All collected samples were kept in transparent polythene bags and labelled with their corresponding local names as given by the key informants. The samples were sent to Wageningen University, The Netherlands, and stored at  $-20^{\circ}\text{C}$  pending analysis.

**Cowpea acceptability study.** This was a cross-sectional study conducted in two schools within two communities (Kpaligun and Tibung) in November 2008. In each school 60 schoolchildren (6–12 years) in lower primary (classes 1–3) were randomly selected to participate, a sample size assumed to be adequate in research based on the TPB [21]. The corresponding 120 caregivers of the selected children were invited for interview and none of them declined participation. In each of the two schools, children were randomly selected from a sampling frame of pupils in lower primary (classes 1–3). The sampling frame was constructed separately for each school by pooling the class registers of lower primary. Inclusion of children in the sampling frame was independent of whether they were present in or absent from school on the day of sampling frame construction. If two or more children were selected from one household, one of them was randomly selected by lottery to participate in the study. The study was approved by the Institutional Review Board of Noguchi Memorial Institute for Medical Research, University of Ghana (NMIMR-IRB 022/08-09). Each volunteer gave verbal informed consent prior to participation.

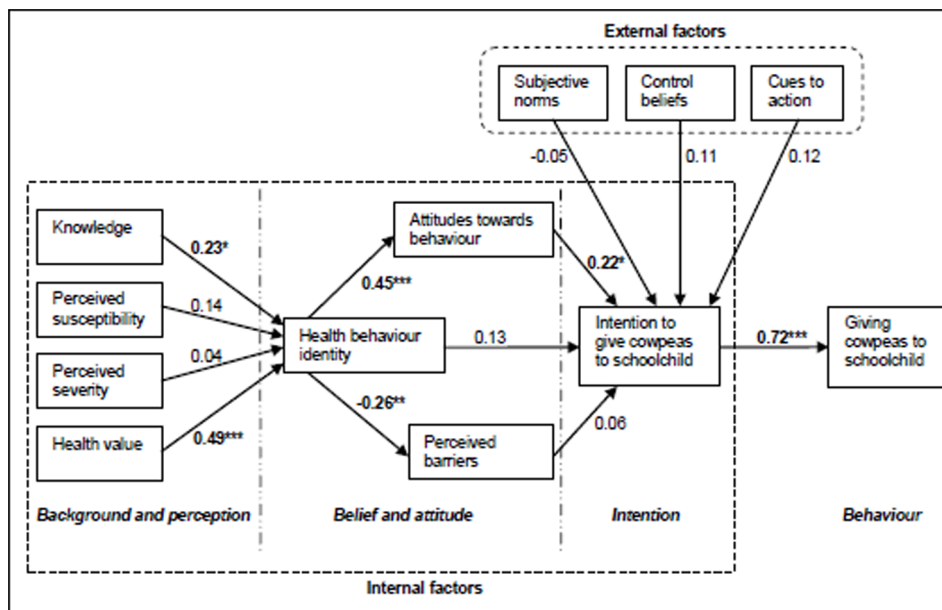

**Figure 1. A combined model of the Theory of Planned Behaviour and Health Belief Model with correlation coefficients between related constructs.** Adapted from Sun et al. [17]. \* $P < 0.05$ ; \*\* $P < 0.01$ ; \*\*\* $P < 0.001$  (2-tailed). doi:10.1371/journal.pone.0072087.g001











26. Murdock LL, Seck D, Ntoukam G, Kitch L, Shade RE (2003) Preservation of cowpea grain in sub-Saharan Africa-Bean/Cowpea CRSP contributions. *Field Crops Research* 82: 169–178.
27. Ndubuaku VO, Uwagbute AC, Nnanyelugo DO (1989) Flatulence and other discomforts associated with consumption of cowpea (*Vigna unguiculata*). *Appetite* 13: 171–181.
28. Samuel FO, Cole AH (2002) A comparison of mothers' knowledge, attitudes, and utilization in relation to soybeans and cowpeas for child feeding in a Nigerian rural area. *Food Nutr Bull* 23: 248–252.
29. Phillips RD, McWatters KH, Chinnan MS, Hung YC, Beuchat LR, et al. (2003) Utilization of cowpeas for human food. *Field Crops Research* 82: 193–213.
30. Osteras N, Gulbrandsen P, Garratt A, Benth JS, Dahl FA, et al. (2008) A randomised comparison of a four- and a five-point scale version of the Norwegian Function Assessment Scale. *Health Qual Life Outcomes* 6: 14.
31. Makower RU (1970) Extraction and determination of phytic acid in beans (*Phaseolus-vulgaris*). *Cereal Chemistry* 47: 288–&.
32. Vanveldhoven PP, Mannaerts GP (1987) Inorganic and organic phosphate measurements in the nanomolar range. *Analytical Biochemistry* 161: 45–48.
33. Singleton VL, Orthofer R, Lamuela-Raventos RM (1999) Analysis of total phenols and other oxidation substrates and antioxidants by means of Folin-Ciocalteu reagent. In: Packer L, editor. *Oxidants and Antioxidants*, Pt A. San Diego: Academic Press. 152–178.
34. Morris ER, Ellis R (1989) Usefulness of the dietary phytic acid/zinc molar ratio as an index of zinc bioavailability to rats and humans. *Biol Trace Elem Res* 19: 107–117.
35. WHO (1996) Trace elements in human nutrition and health; Mills CF, editor. Geneva, Switzerland: World Health Organization (WHO).
36. Field A (2005) *Discovering statistics using SPSS*; Wright DB, editor. London, United Kingdom: SAGE Publications.
37. Madodé YE, Linnemann AR, Nout MJR, Vosman B, Hounhouigan DJ, et al. (2012) Nutrients, technological properties and genetic relationships among twenty cowpea landraces cultivated in West Africa. *International Journal of Food Science & Technology* 47: 2636–2647.
38. Petry N, Egli I, Zeder C, Walczyk T, Hurrell R (2010) Polyphenols and phytic acid contribute to the low iron bioavailability from common beans in young women. *J Nutr* 140: 1977–1982.
39. Turnlund JR, King JC, Keyes WR, Gong B, Michel MC (1984) A stable isotope study of zinc absorption in young men: effects of phytate and alpha-cellulose. *Am J Clin Nutr* 40: 1071–1077.
40. Hallberg L, Brune M, Rossander L (1989) Iron-absorption in man - ascorbic-acid and dose-dependent inhibition by phytate. *American Journal of Clinical Nutrition* 49: 140–144.
41. Hurrell R (2002) How to ensure adequate iron absorption from iron-fortified food. *Nutrition Reviews* 60: S7–S15.
42. Abizari AR, Moretti D, Schuth S, Zimmermann MB, Armar-Klemesu M, et al. (2012) Phytic Acid-to-Iron Molar Ratio Rather than Polyphenol Concentration Determines Iron Bioavailability in Whole-Cowpea Meal among Young Women. *J Nutr* 142: 1950–1955.
43. Macharia-Mutie CW, Van de Wiel AM, Moreno-Londono AM, Mwangi AM, Brouwer ID (2011) Sensory acceptability and factors predicting the consumption of grain amaranth in Kenya. *Ecol Food Nutr* 50: 375–392.
44. Kim K, Reicks M, Sjöberg S (2003) Applying the theory of planned behavior to predict dairy product consumption by older adults. *J Nutr Educ Behav* 35: 294–301.
45. Rah JH, Hasler CM, Painter JE, Chapman-Novakofski KM (2004) Applying the theory of planned behavior to women's behavioral attitudes on and consumption of soy products. *J Nutr Educ Behav* 36: 238–244.
46. McEachan RRC, Conner M, Taylor NJ, Lawton RJ (2011) Prospective prediction of health-related behaviours with the Theory of Planned Behaviour: a meta-analysis. *Health Psychology Review* 5: 97–144.
47. Conner M, Sheeran P, Norman P, Armitage CJ (2000) Temporal stability as a moderator of relationships in the Theory of Planned Behaviour. *Br J Soc Psychol* 39 Pt 4: 469–493.
48. Sheeran P, Orbell S, Trafimow D (1999) Does the temporal stability of behavioral intentions moderate intention-behavior and past behavior-future behavior relations? *Personality and Social Psychology Bulletin* 25: 721–730.
49. Armitage CJ, Conner M (2001) Efficacy of the Theory of Planned Behaviour: A meta-analytic review. *British Journal of Social Psychology* 40: 471–499.
50. Sheeran P, Norman P, Orbell S (1999) Evidence that intentions based on attitudes better predict behaviour than intentions based on subjective norms. *European Journal of Social Psychology* 29: 403–406.
51. Mishili FJ, Fulton J, Shehu M, Kushwaha S, Marfo K, et al. (2009) Consumer preferences for quality characteristics along the cowpea value chain in Nigeria, Ghana, and Mali. *Agribusiness* 25: 16–35.
